# Supplementary material
Source: HighWire-hosted journal article supplement (https://bjo.bmj.com/content/bjophthalmol-2021-320631)
Supplement: inline-supplementary-material-1 [file inline-supplementary-material-1.pdf]

**Supplementary Table 1.** Number of anti-glaucoma medications by reasons for treatment failure at 1 year

| Reasons for failure                              | Number of anti-glaucoma medications |          |          |          |          |          |           |
|--------------------------------------------------|-------------------------------------|----------|----------|----------|----------|----------|-----------|
|                                                  | 0                                   | 1        | 2        | 3        | 4        | 5        | Total     |
| A* IOP > 21 mmHg as isolated cause               | 0                                   | 1        | 0        | 0        | 0        | 0        | 1         |
| B* <20% IOP reduction as isolated cause          | 7                                   | 2        | 1        | 1        | 0        | 0        | 11        |
| (A+B)* IOP > 21 and <20% IOP reduction (total 6) | 3                                   | 2        | 1        | 0        | 0        | 0        | 6         |
| <b>Total A* + B* + (A+B)*</b>                    | <b>10</b>                           | <b>5</b> | <b>2</b> | <b>1</b> | <b>0</b> | <b>0</b> | <b>18</b> |
